# Supplementary material for: Co-sputtered phase-change Ga–Sb–Te thin films
Source: Royal Society of Chemistry journal article supplement (doi:10.1039/d4ma00049h), 2024-01-01
Supplement: d4ma00049h1.pdf [file d4ma00049h1.pdf]

## Electronic Supplementary Information

### Co-sputtered phase-change Ga-Sb-Te thin films

Magdaléna Kotrla<sup>a</sup>, Petr Janíček<sup>b,c</sup>, Jan Gutwirth<sup>a</sup>, Tomáš Halenkovič<sup>a</sup>, Jan Přikryl<sup>c</sup>, Stanislav Šlang<sup>c</sup>, François Cheviré<sup>d</sup>, Virginie Nazabal<sup>d,a</sup>, Petr Němec<sup>\*a</sup>

<sup>a</sup> Department of Graphic Arts and Photophysics, Faculty of Chemical Technology, University of Pardubice, Studentská 95, 53210 Pardubice, Czech Republic

<sup>b</sup> Institute of Applied Physics and Mathematics, Faculty of Chemical Technology, University of Pardubice, Studentská 95, 532 10 Pardubice, Czech Republic

<sup>c</sup> Center of Materials and Nanotechnologies, Faculty of Chemical Technology, University of Pardubice, Studentská 95, 532 10 Pardubice, Czech Republic

<sup>d</sup> Univ Rennes, CNRS, ISCR (Institut des Sciences Chimiques de Rennes) – UMR 6226, F-35000 Rennes, France

\* Corresponding author: [petr.nemec@upce.cz](mailto:petr.nemec@upce.cz) (Petr Němec)

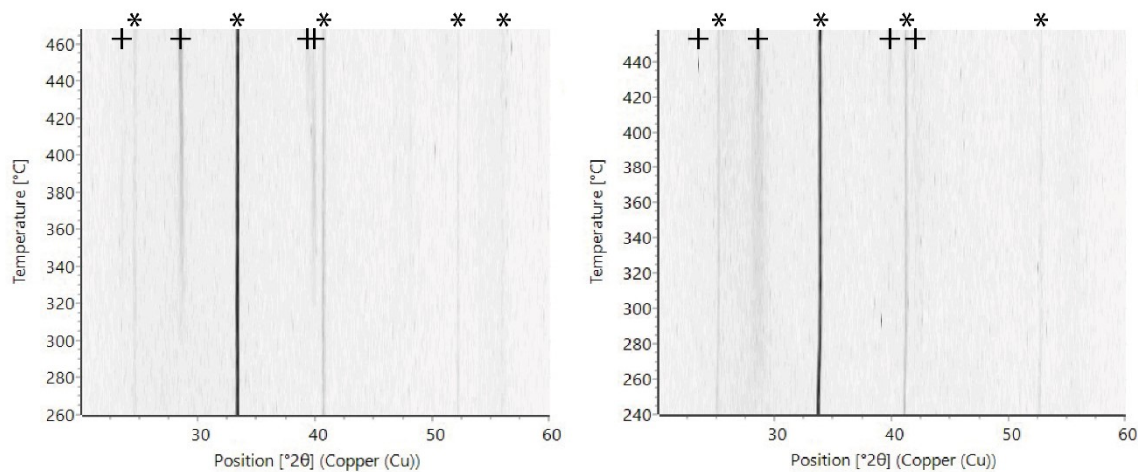

Figure S1 Temperature-dependent XRD plots of  $\text{Ga}_5\text{Sb}_3\text{Te}_2$  (left) and  $\text{Ga}_3\text{Sb}_3\text{Te}_2$  (right) thin films (100 nm). '\*' symbol denotes the peaks originating from the substrate, '+' symbol denotes the peaks originating from the layer.

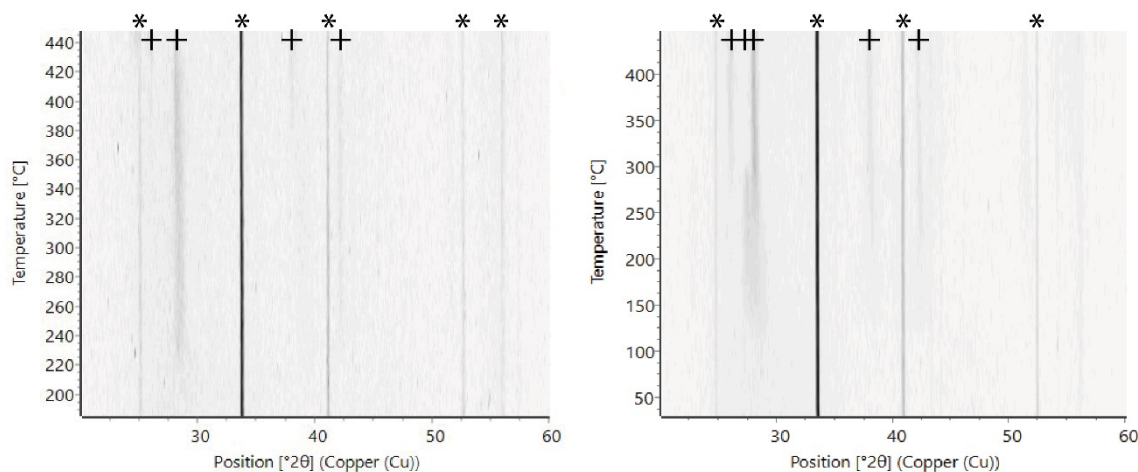

Figure S2 Temperature-dependent XRD plots of  $\text{Ga}_2\text{Sb}_2\text{Te}_3$  (left) and  $\text{GaSbTe}_4$  (right) thin films (100 nm). '\*' symbol denotes the peaks originating from the substrate, '+' symbol denotes the peaks originating from the layer.

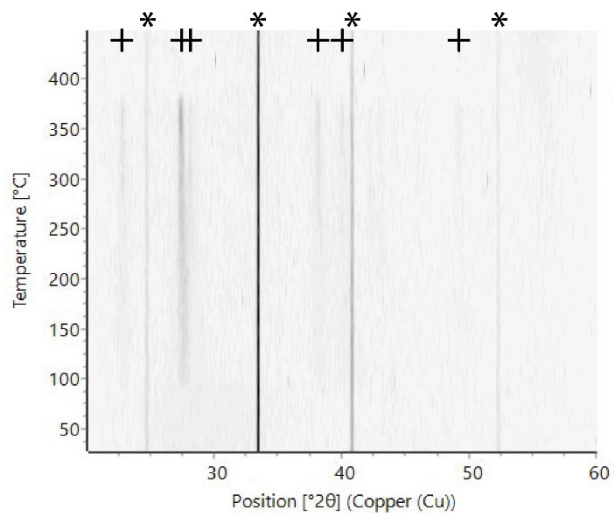

Figure S3 Temperature-dependent XRD plots of  $\text{GaSbTe}_3$  thin film (100 nm). '\*' symbol denotes the peaks originating from the substrate, '+' symbol denotes the peaks originating from the layer.
